# Supplementary material
Source: Springer Nature journal article supplement (https://hal.science/hal-01341221v1/file/12711_2012_2602_MOESM2_ESM.pdf)

# Genetic correlation between ADGWEA and ADGINF1 ( PED model )

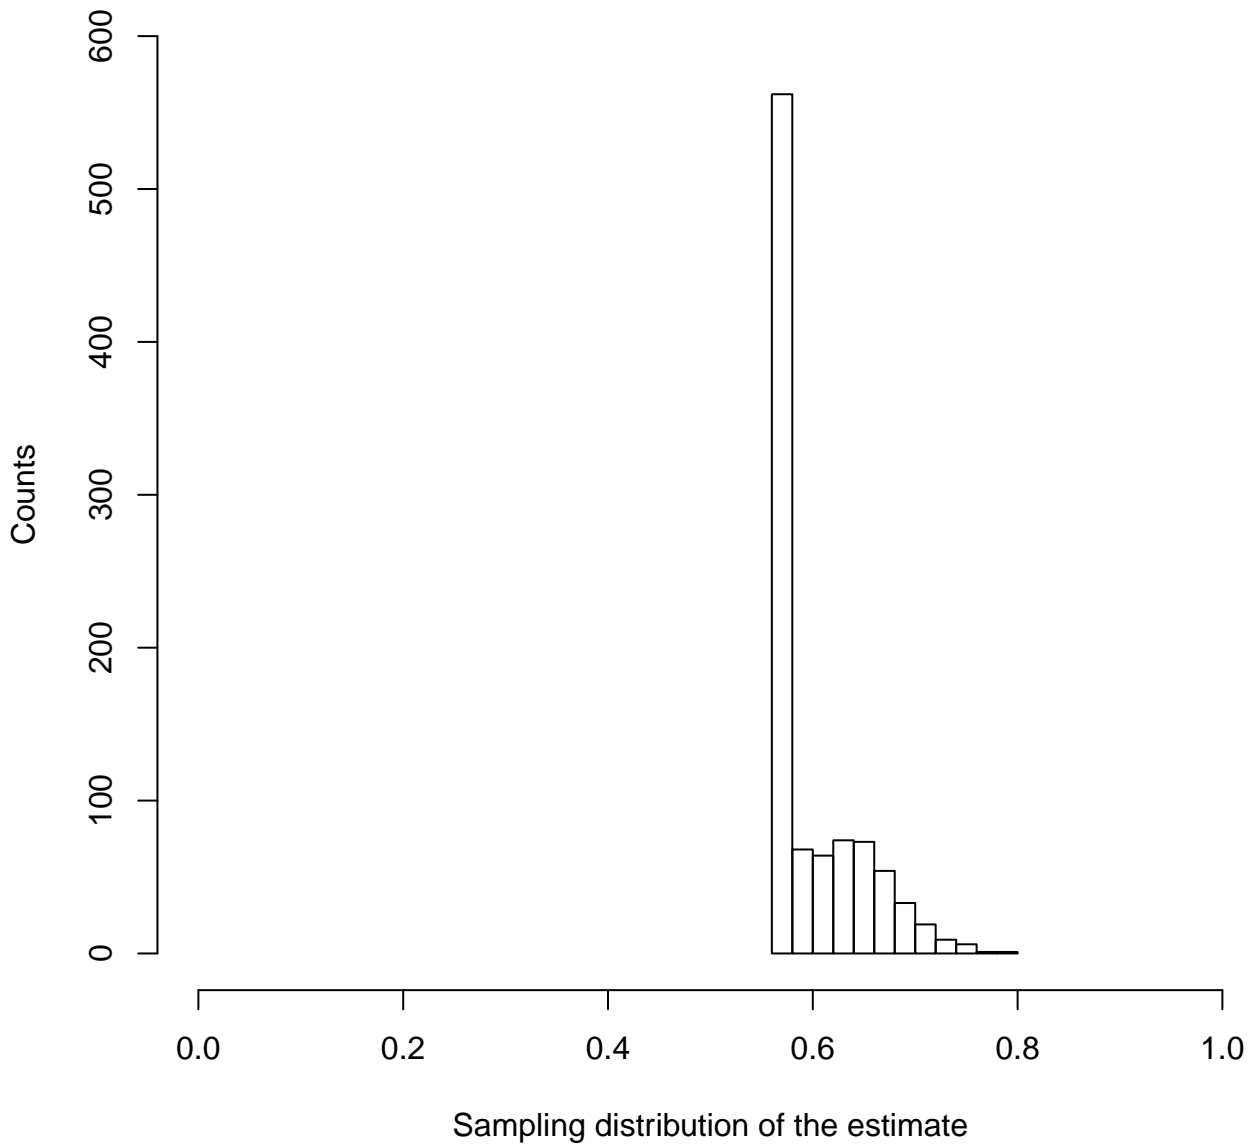

Supplement: MOESM2 [file 12711_2012_2602_MOESM2_ESM.pdf]
